# Supplementary material for: A heat-sensitive Osh protein controls PI4P polarity
Source: PubMed Central journal article supplement (PMC7071650; doi:10.1186/s12915-020-0758-x), 2020-03-13

**a**

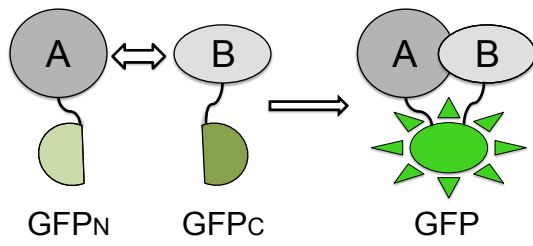

**b**

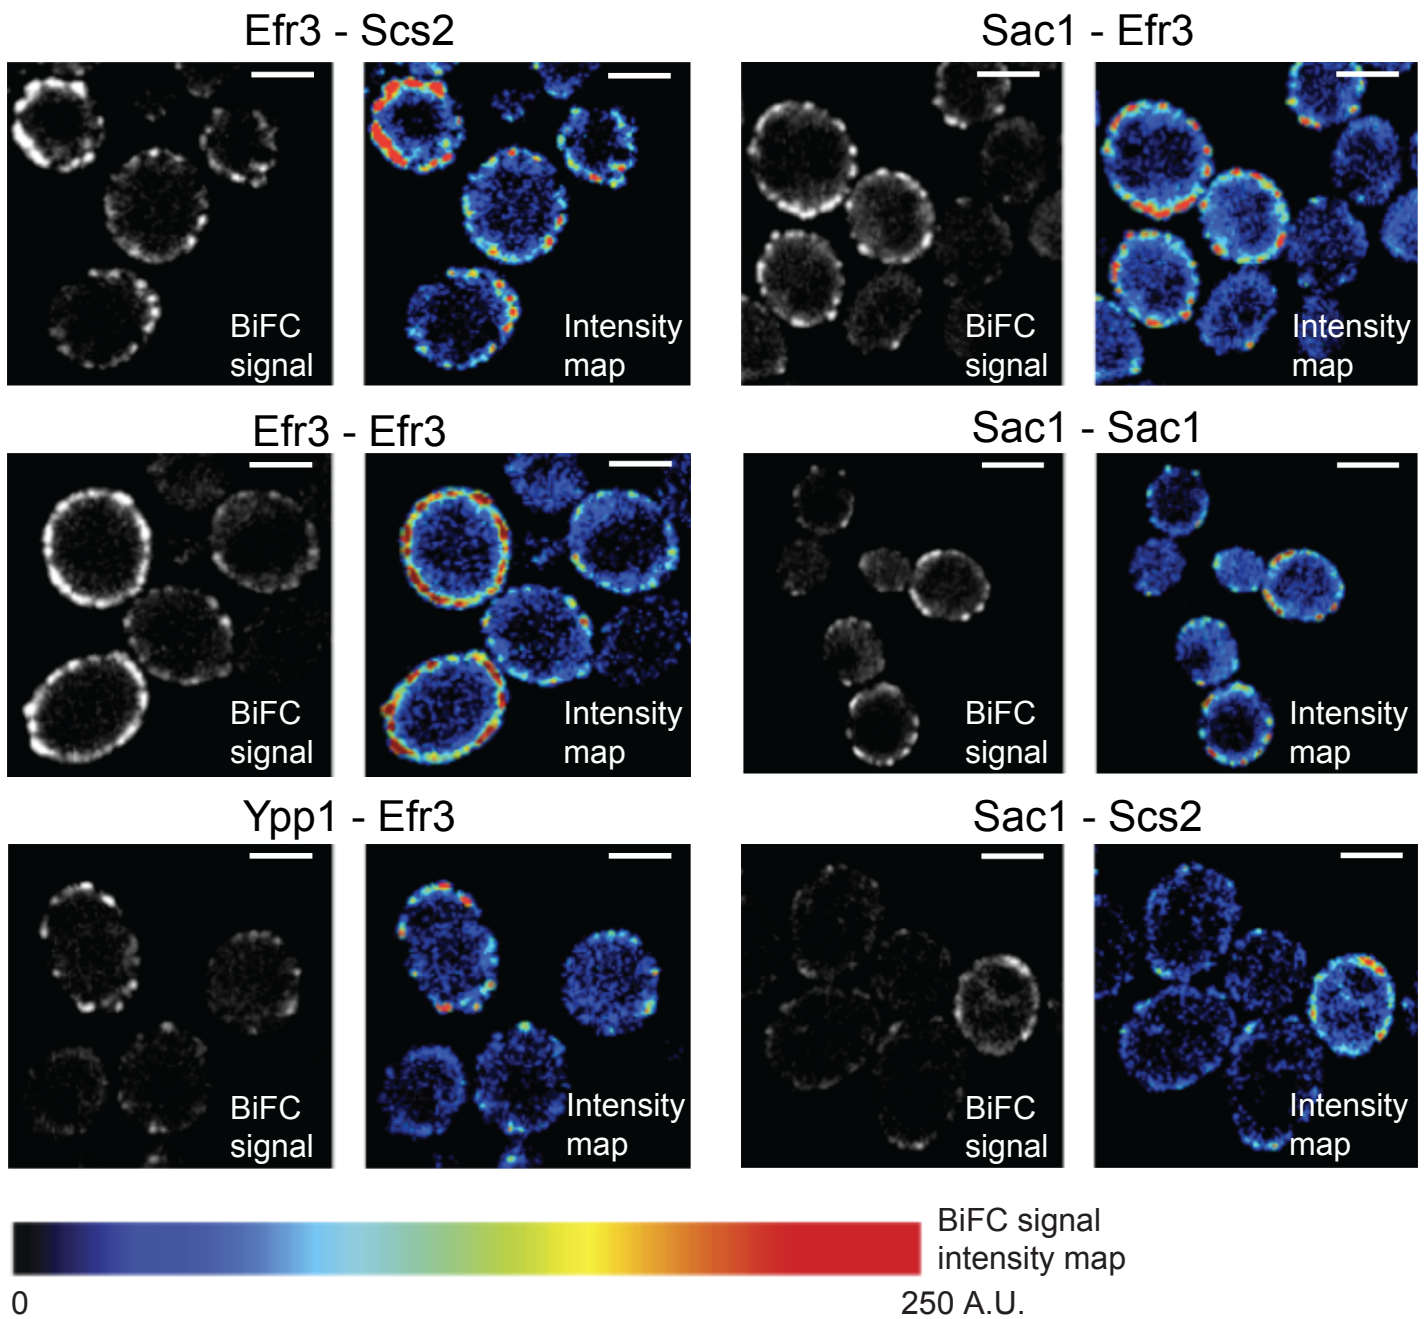

Supplement: 12915_2020_758_MOESM8_ESM.pdf [file 12915_2020_758_MOESM8_ESM.pdf]
