# Supplementary material for: A heat-sensitive Osh protein controls PI4P polarity
Source: PubMed Central journal article supplement (PMC7071650; doi:10.1186/s12915-020-0758-x), 2020-03-13

# Omnus *et al.*, Figure S5

**a**

Osh3-GFP 42°C, 10min:

early Golgi  
(mRFP-Sed5)

medial Golgi  
(mRFP-Gos1)

late Golgi  
(Sec7-DsRed)

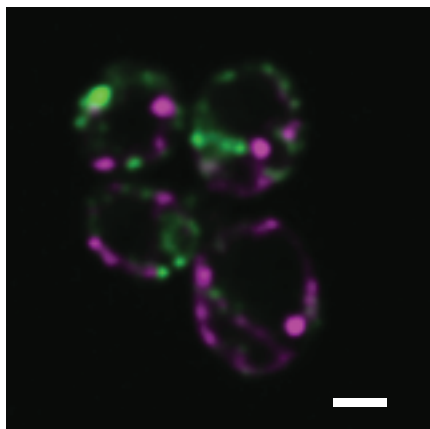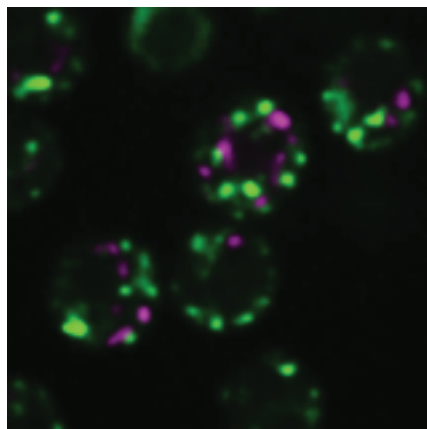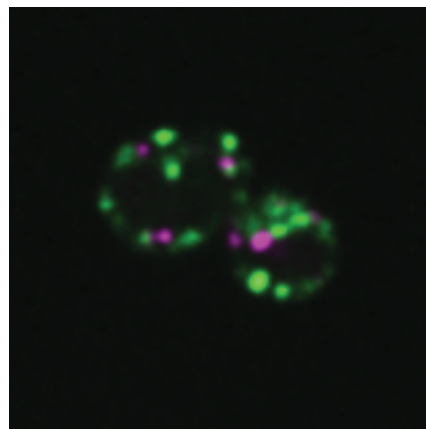

endosomes  
(mRFP-FYVE)

ER  
(DsRed-HDEL)

lipid droplets  
(MDH)

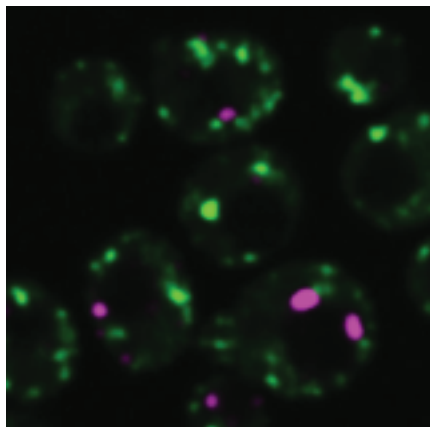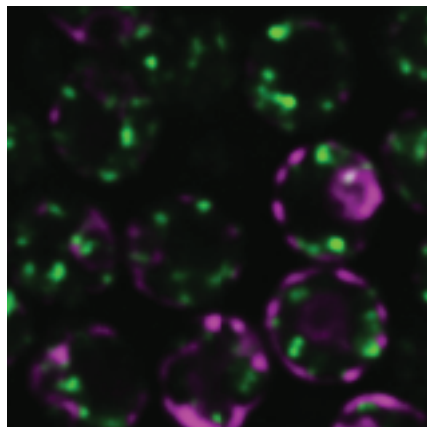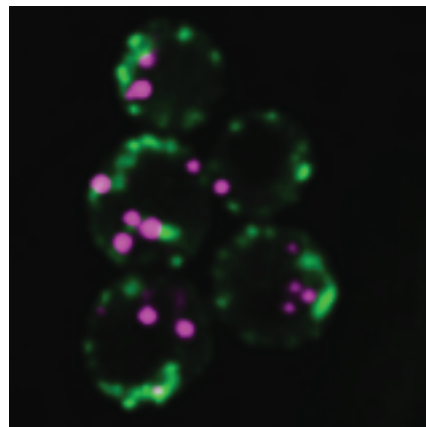

**b**

26°C

10min 42°C

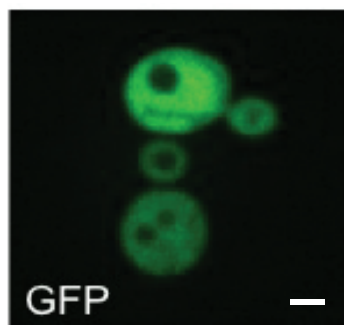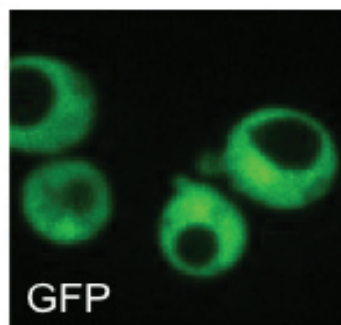

Supplement: 12915_2020_758_MOESM15_ESM.pdf [file 12915_2020_758_MOESM15_ESM.pdf]
