# Supplementary material for: A heat-sensitive Osh protein controls PI4P polarity
Source: PubMed Central journal article supplement (PMC7071650; doi:10.1186/s12915-020-0758-x), 2020-03-13

BY4741 (WT) *hsp104* $\Delta$  *hsp42* $\Delta$  SEY6210.1 (WT)

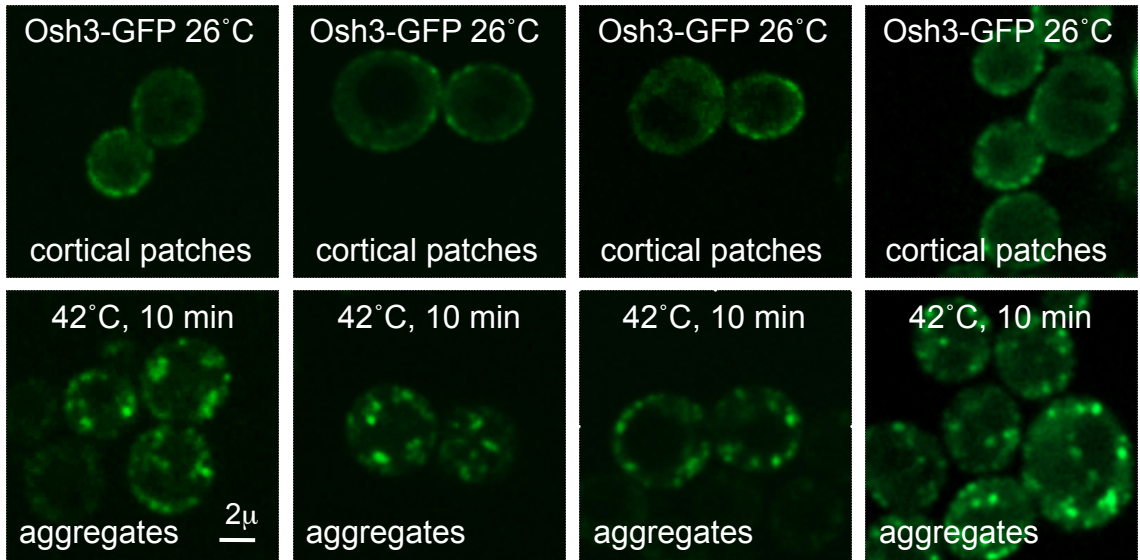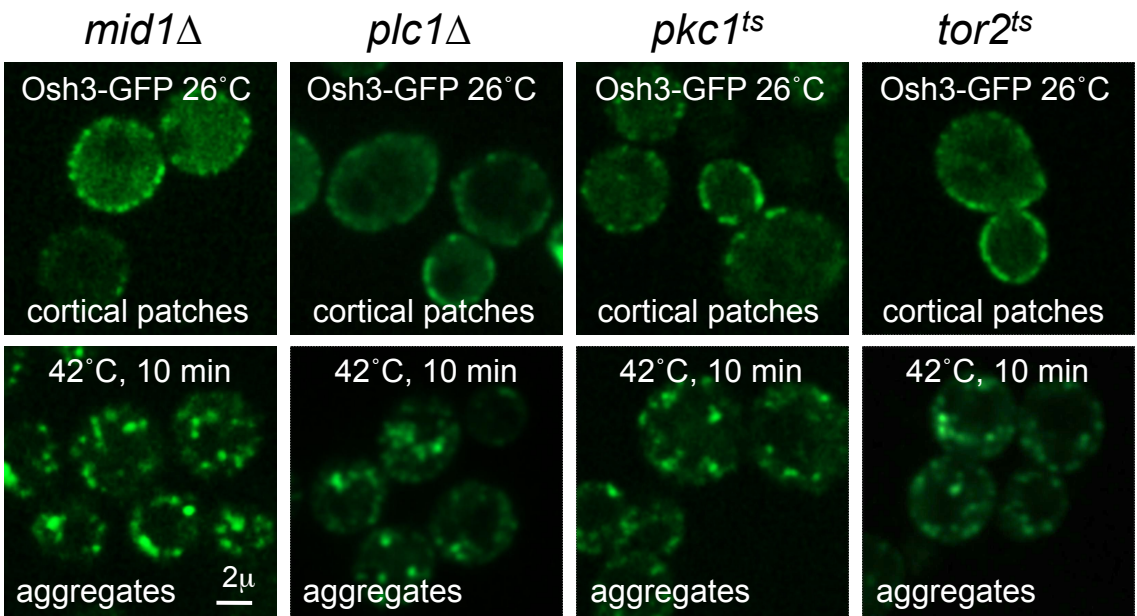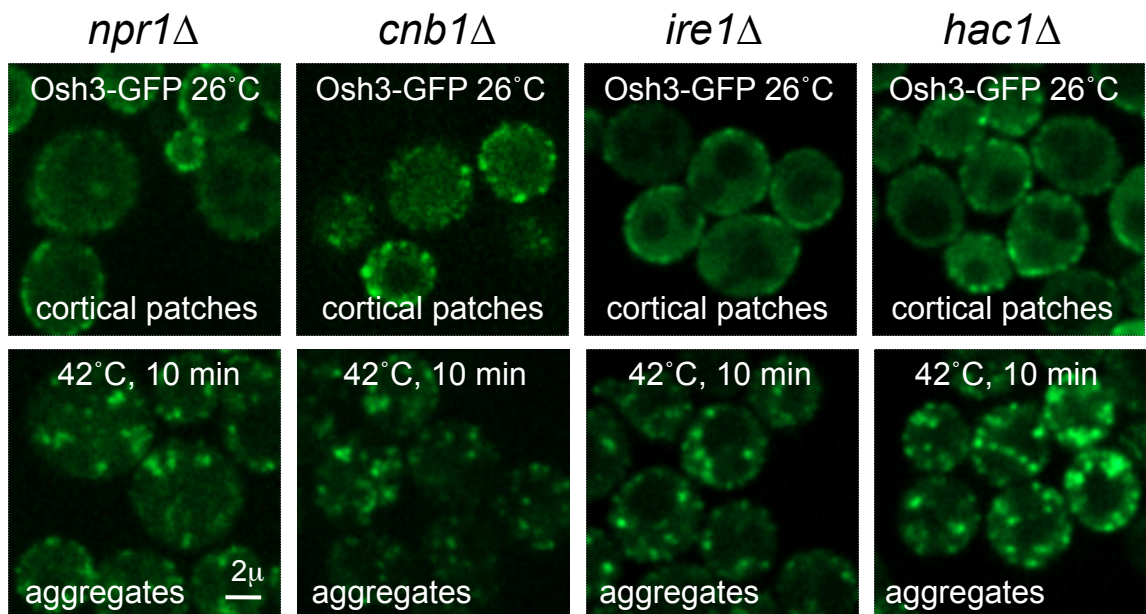

Supplement: 12915_2020_758_MOESM18_ESM.pdf [file 12915_2020_758_MOESM18_ESM.pdf]
